# Supplementary material for: Enhancing the electrode performance of Co3O4 through Co3O4@a-TiO2 core–shell microcubes with controllable pore size
Source: Royal Society of Chemistry journal article supplement (doi:10.1039/c5ra06711a), 2015-01-01
Supplement: c5ra06711a1.pdf [file c5ra06711a1.pdf]

## Electronic Supplementary Information

---

### Enhancing the Electrode Performance of $\text{Co}_3\text{O}_4$ through $\text{Co}_3\text{O}_4@\alpha\text{-TiO}_2$ Core–Shell Microcubes with Controllable Pore Size

Yanting Chu,<sup>a</sup> Jinkui Feng,<sup>a</sup> Yitai Qian,<sup>a,b</sup> Shenglin Xiong,<sup>a,c\*</sup>

<sup>a</sup>Key Laboratory of the Colloid and Interface Chemistry, Ministry of Education, and School of Chemistry and Chemical Engineering, Shandong University, Jinan, 250100, PR China

E-mail: [chexsl@sdu.edu.cn](mailto:chexsl@sdu.edu.cn) (S. L. X.)

<sup>b</sup>Hefei National Laboratory for Physical Science at Microscale and Department of Chemistry, University of Science and Technology of China, Hefei, Anhui, 230026 (P. R. China)

<sup>c</sup>CAS Key Laboratory of Materials for Energy Conversion, University of Science and Technology of China, Hefei, Anhui, 230026, P. R. China

## Supplementary Figures

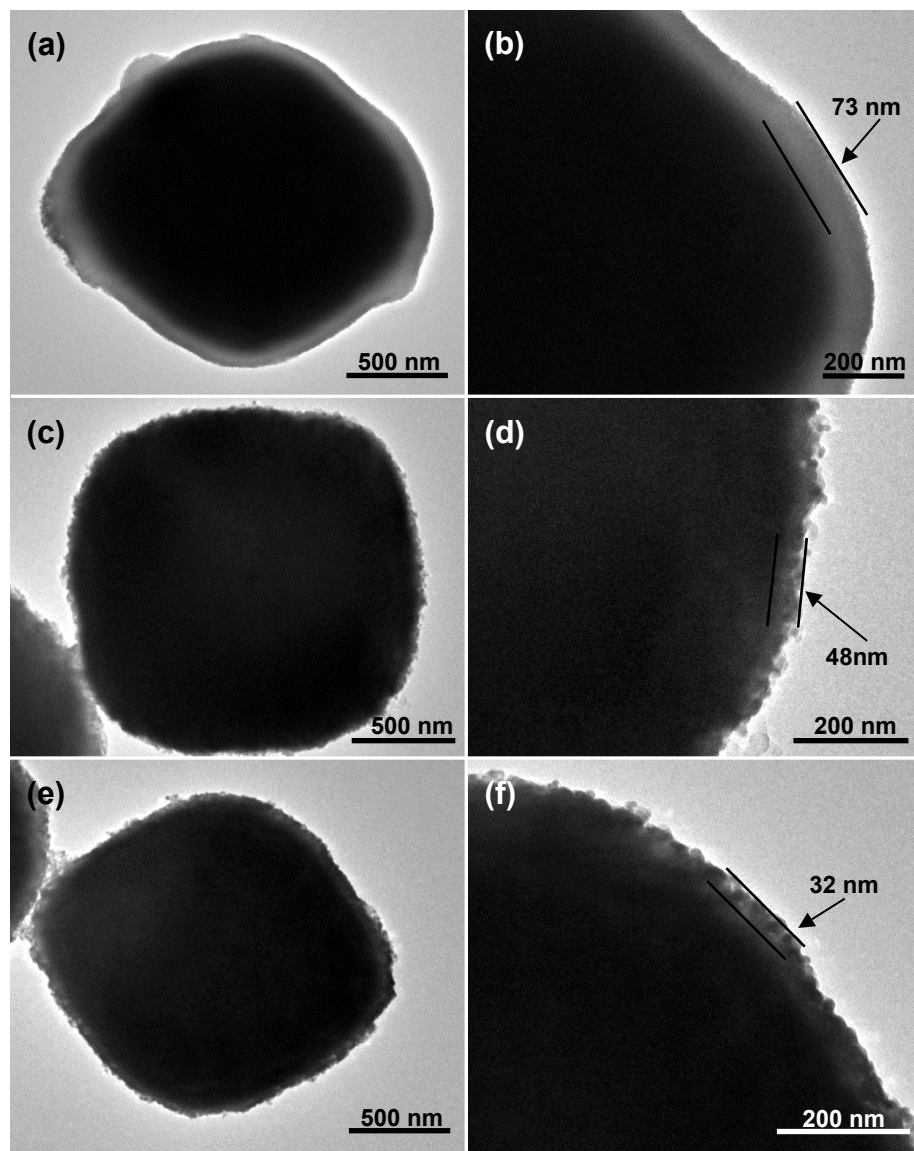

**Figure S1.** High-magnification TEM images of the S-40, S-80, S-120 with a-TiO<sub>2</sub> layers of different thickness( S-40:a, b; S-80: c, d; S-120:e, f).

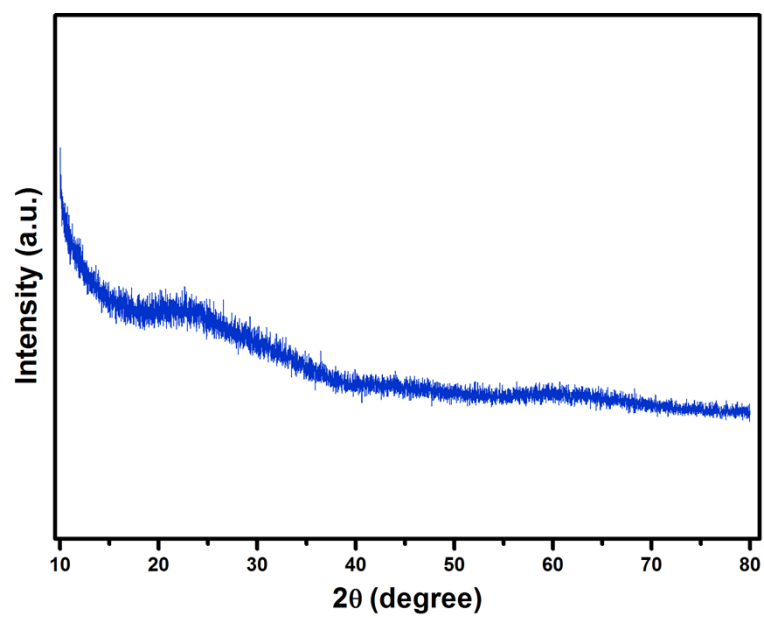

**Figure S2.** XRD pattern of the a-TiO<sub>2</sub>.

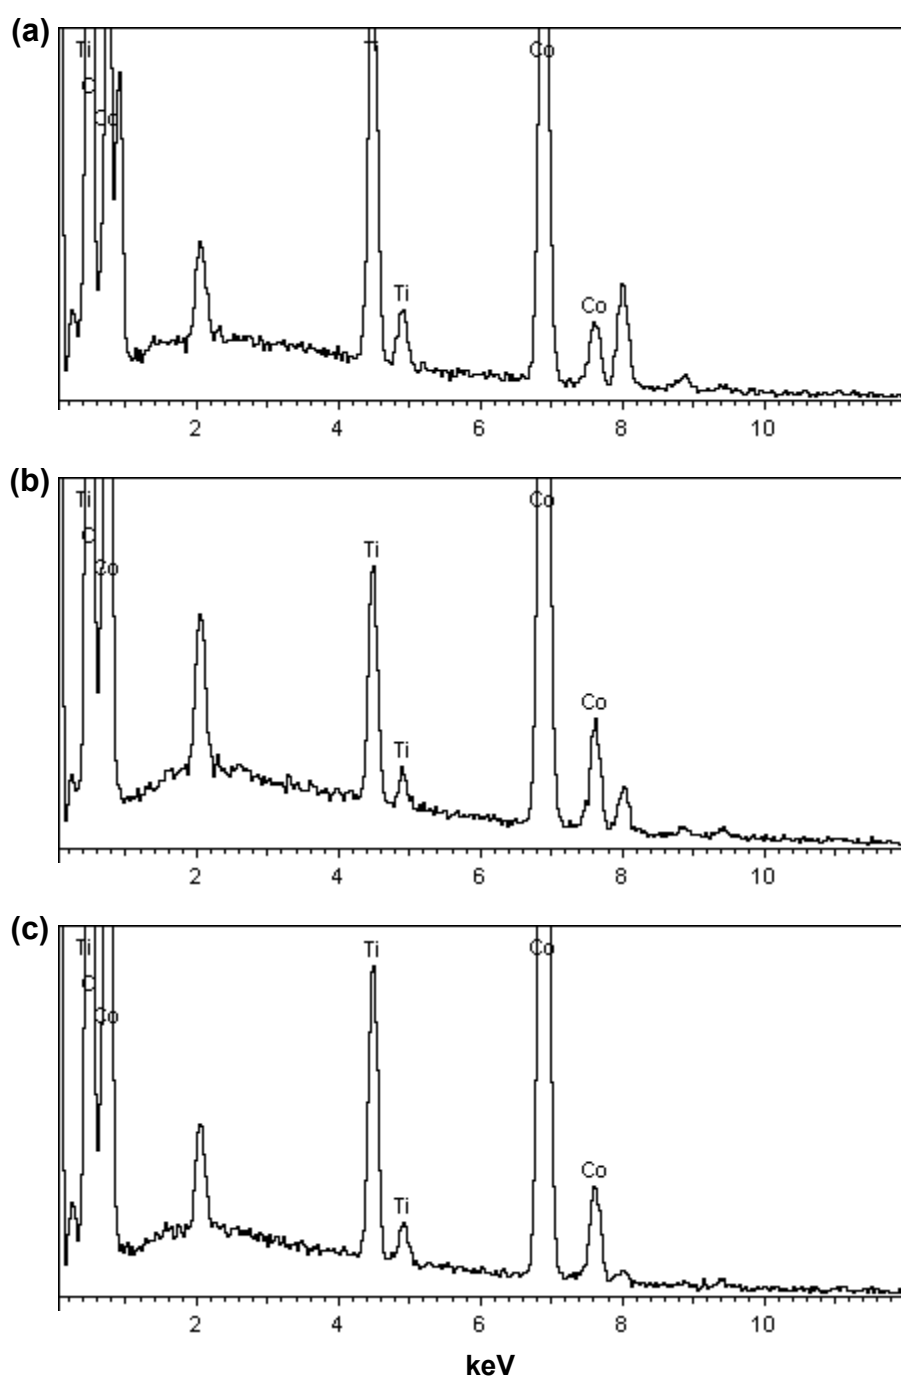

**Figure S3.** EDS of the sample S-40 (a), S-80 (b), S-120 (c).

**Table S1.** Quantitative analysis of Co and Ti contents by ICP-AES.

| Sample | mass ratio<br>Co% | mass ratio<br>Ti% | Co <sub>3</sub> O <sub>4</sub> :TiO <sub>2</sub><br>mass ratio<br>% |
|--------|-------------------|-------------------|---------------------------------------------------------------------|
| S-0    |                   |                   | 1:0                                                                 |
| S-40   | 7.62              | 3.07              | 2.03:1                                                              |
| S-80   | 11.99             | 1.92              | 5.17:1                                                              |
| S-120  | 9.32              | 0.65              | 11.65:1                                                             |

**Table S2.** Physical properties from N<sub>2</sub> sorption studies of the four samples.

| Samples | Specific surface<br>area<br>(m <sup>2</sup> g <sup>-1</sup> ) | BJH Desorption<br>Average pore size<br>(nm) | Pore volume<br>(cm <sup>3</sup> g <sup>-1</sup> ) |
|---------|---------------------------------------------------------------|---------------------------------------------|---------------------------------------------------|
| S-0     | 73.55                                                         | 9.49                                        | 0.25                                              |
| S-40    | 105.67                                                        | 5.20                                        | 0.14                                              |
| S-80    | 85.40                                                         | 6.22                                        | 0.17                                              |
| S-120   | 56.38                                                         | 10.87                                       | 0.21                                              |

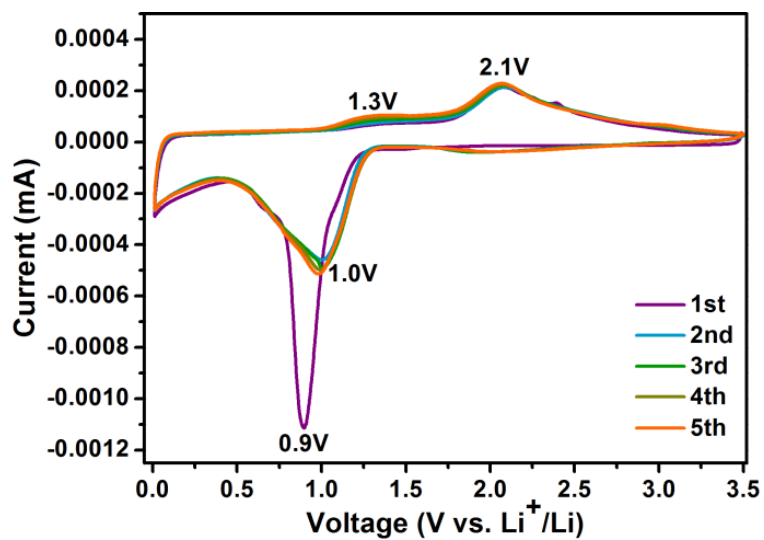

**Figure S4.** Cyclic voltammetry (CV) curves for the S-0 at a scan rate of 0.1  $\text{mV s}^{-1}$  in the voltage windows of 0.01-3.5 V.

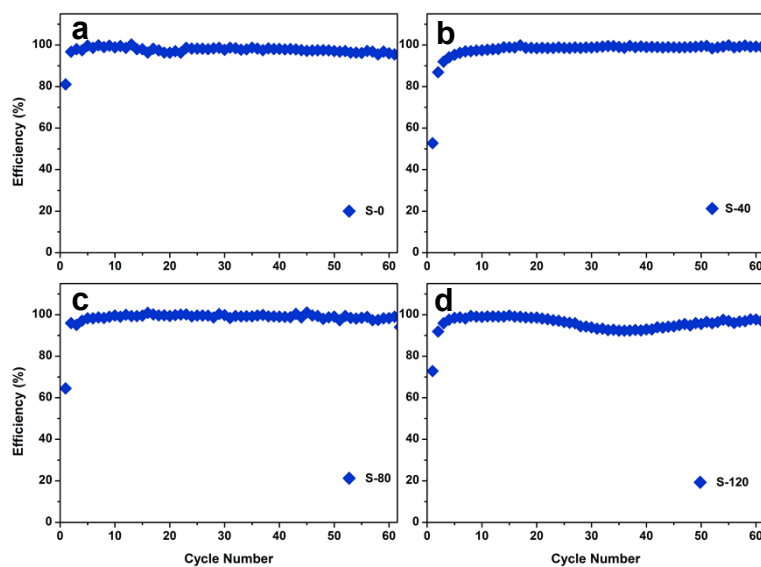

**Figure S5.** The Coulombic efficiency for the samples (S-0: a; S-40: b; S-80: c; S-120: d).

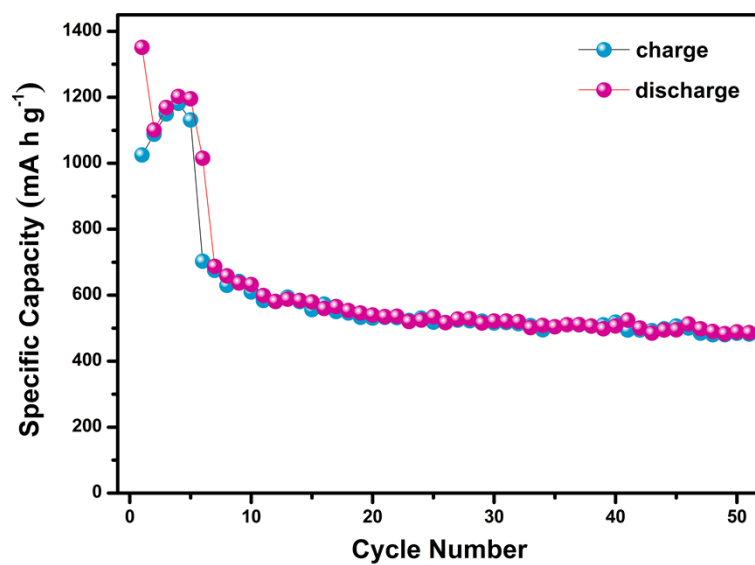

**Figure S6.** Cycle performance of S-80 at a current density of 2 A g<sup>-1</sup>.

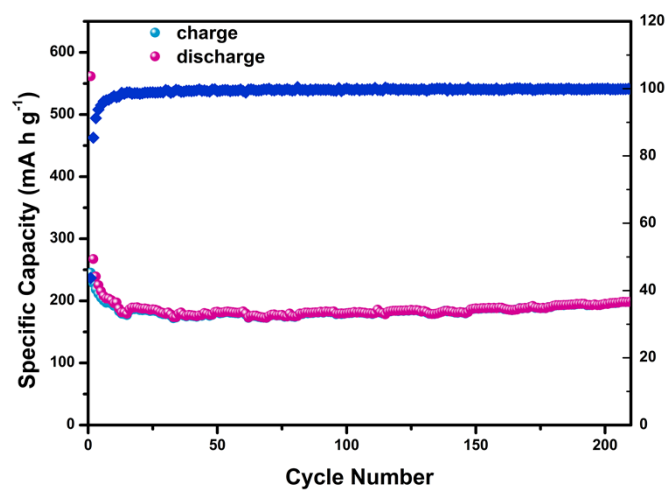

**Figure S7.** Charge-discharge curves of a-TiO<sub>2</sub> at a current density of 0.5 A g<sup>-1</sup>.
